# Supplementary material
Source: publisher site journal article supplement (https://www.e-cmh.org/upload/media/cmh-2021-0188-suppl3.pdf)
Supplement: Supplementary file 1 [file cmh-2021-0188-suppl3.pdf]

**Supplementary Table 3.** The baseline characteristics of the patients from the derivation and validation cohorts (LSM cohort)

| Characteristic                       | Derivation cohort | Validation cohort | P-value |
|--------------------------------------|-------------------|-------------------|---------|
| Total                                | 2,141             | 2,141             |         |
| Age (years)                          | 55.6±12.2         | 55.7±12.3         | 0.746   |
| Male sex                             | 1,212 (56.6)      | 1,155 (53.9)      | 0.080   |
| HBV infection                        | 699 (32.6)        | 676 (31.6)        | 0.452   |
| HCV infection                        | 65 (3.0)          | 66 (3.1)          | 0.929   |
| NAFLD                                | 794 (37.1)        | 787 (36.8)        | 0.825   |
| Type 2 diabetes mellitus             | 491 (22.9)        | 503 (23.5)        | 0.664   |
| Hypertension                         | 1,164 (54.4)      | 1,126 (52.6)      | 0.244   |
| Hypercholesterolemia                 | 1,182 (55.2)      | 1,182 (55.2)      | 0.999   |
| Body mass index (kg/m <sup>2</sup> ) | 26 (23–29)        | 26 (23–28)        | 0.654   |
| ALT (IU/L)                           | 25 (18–39)        | 26 (18–39)        | 0.461   |
| Albumin (g/L)                        | 43.6±3.1          | 43.6±3.1          | 0.853   |
| Total bilirubin (μmol/L)             | 10.6 (7.9–14.1)   | 10.4 (8.0–13.8)   | 0.281   |
| ALP (IU/L)                           | 67 (56–80)        | 67 (56–82)        | 0.362   |
| AFP (μg/L)                           | 2.8 (2.0–4.1)     | 2.7 (1.9–4.1)     | 0.472   |
| WCC (×10 <sup>9</sup> /L)            | 6.5±1.9           | 6.7±2.0           | 0.036   |
| Platelet (×10 <sup>9</sup> /L)       | 213 (173–253)     | 215 (177–257)     | 0.249   |
| Prothrombin time (seconds)           | 10.7 (10.2–11.3)  | 10.7 (10.1–11.3)  | 0.235   |
| INR                                  | 1.0 (0.9–1.0)     | 1.0 (0.9–1.0)     | 0.330   |
| Triglycerides (mmol/L)               | 1.1 (0.8–1.7)     | 1.2 (0.8–1.7)     | 0.452   |
| Cholesterol (mmol/L)                 | 4.5 (3.9–5.2)     | 4.5 (3.8–5.2)     | 0.326   |
| FBS (mmol/L)                         | 6.0 (5.1–7.6)     | 6.0 (5.0–7.8)     | 0.801   |
| Haemoglobin A1c (%)                  | 6.7 (5.8–7.7)     | 6.7 (5.8–7.8)     | 0.920   |
| Positive HBeAg*                      | 112 (19.8)        | 101 (18.3)        | 0.535   |
| HBV DNA* (log <sub>10</sub> IU/mL)   | 4 (3–6)           | 4 (3–6)           | 0.111   |
| Creatinine (μmol/L)                  | 75 (62–89)        | 75 (62–88)        | 0.613   |
| eGFR (mL/min/1.73 m <sup>2</sup> )   | 92.7 (76.9–104.4) | 92.6 (76.9–103.9) | 0.911   |
| Urea (mmol/L)                        | 5.1 (4.2–6.2)     | 5.1 (4.3–6.3)     | 0.626   |
| LSM (kPa)                            | 5.9 (4.5–8.0)     | 5.9 (4.6–7.9)     | 0.711   |
| CAP (dB/m)                           | 262 (216–312)     | 262 (218–309)     | 0.816   |
| Medication use                       |                   |                   |         |
| Statins                              | 907 (42.4)        | 900 (42.0)        | 0.829   |
| Anti-platelet drugs                  | 421 (19.7)        | 413 (19.3)        | 0.758   |
| Antiviral treatment                  | 334 (15.6)        | 291 (13.6)        | 0.063   |

Values are presented as mean±standard deviation, median (interquartile range), or number (%).

LSM, liver stiffness measurement; HBV, hepatitis B virus; HCV, hepatitis C virus; NAFLD, nonalcoholic fatty liver disease; ALT, alanine aminotransferase; ALP, alkaline phosphatase; AFP, alpha-fetoprotein; WCC, white cell count; INR, international normalized ratio; FBS, fasting blood sugar level; HBeAg, hepatitis B e antigen; eGFR, estimated glomerular filtration rate; CAP, controlled attenuation parameter.

\*HBeAg and HBV DNA data are only shown among chronic hepatitis B patients. HCV RNA data are not reported as very few patients who had HCV RNA checked.
